# Supplementary material for: Protein-Energy Wasting Assessment and Clinical Outcomes in Patients with Acute Kidney Injury: A Systematic Review with Meta-Analysis
Source: MDPI journal article supplement (doi:10.3390/nu12092809), 2020-09-13
Supplement: s1 [file s1]

Table S1. Full search strategy

| No. | Database                   | Search Terms and Results                                                                                                                                                                                                                                                                                                                                                                                                                                                                                                                                                                                                                                                                                                                                                                                                                                                                                                                                                                                                                                                                                                                                                                                                                                                                                                                                                                                                                                                                                                                                                                                                                                                                                                                                                                                                                                                                                                                                                                                                                                                                                                                                                                                       |
|-----|----------------------------|----------------------------------------------------------------------------------------------------------------------------------------------------------------------------------------------------------------------------------------------------------------------------------------------------------------------------------------------------------------------------------------------------------------------------------------------------------------------------------------------------------------------------------------------------------------------------------------------------------------------------------------------------------------------------------------------------------------------------------------------------------------------------------------------------------------------------------------------------------------------------------------------------------------------------------------------------------------------------------------------------------------------------------------------------------------------------------------------------------------------------------------------------------------------------------------------------------------------------------------------------------------------------------------------------------------------------------------------------------------------------------------------------------------------------------------------------------------------------------------------------------------------------------------------------------------------------------------------------------------------------------------------------------------------------------------------------------------------------------------------------------------------------------------------------------------------------------------------------------------------------------------------------------------------------------------------------------------------------------------------------------------------------------------------------------------------------------------------------------------------------------------------------------------------------------------------------------------|
| 1.  | PubMed<br>(12 Feb<br>2020) | <p>#1: “Acute Kidney Injury”[Mesh] OR “Kidney/Injuries”[Mesh] OR “Continuous Renal Replacement Therapy”[Mesh] OR acute kidney injury[title/abstract] OR acute renal failure[title/abstract] OR continuous renal replacement therapy [title/abstract] <b>68380</b></p> <p>#2: “Nutrition Assessment”[Mesh] OR “Nutritional Status”[Mesh] OR “Protein-Energy Malnutrition”[Mesh] OR “Malnutrition”[Mesh] OR nutrition assessment [title/abstract] OR nutritional assessment[title/abstract] OR nutrition risk[title/abstract] OR nutritional risk[title/abstract] OR nutrition assessment[title/abstract] OR nutritional assessment[title/abstract] OR malnutrition[title/abstract] OR protein energy malnutrition[title/abstract] OR protein energy wasting[title/abstract] <b>186295</b></p> <p>#3: Anthropometry[Mesh] OR “Body Composition”[Mesh] OR “Muscle Strength”[Mesh] OR “Body Weights and Measures”[Mesh] OR body weight[title/abstract] OR body mass[title/abstract] OR body mass index[title/abstract] OR muscle mass[title/abstract] OR body fat[title/abstract] <b>925826</b></p> <p>#4: “Proteins/blood”[Mesh] OR albumin[title/abstract] OR prealbumin[title/abstract] OR cholesterol[title/abstract] <b>847985</b></p> <p>#5: “Nutrients”[Mesh] OR “Dietary Proteins”[Mesh] OR “Enteral Nutrition”[Mesh] OR “Parenteral Nutrition”[Mesh] OR energy intake[title/abstract] OR protein intake[title/abstract] OR macronutrient*[title/abstract] OR micronutrient*[title/abstract] OR trace element*[title/abstract] <b>228498</b></p> <p>#6: #2 OR #3 OR #4 OR #5 <b>1978969</b></p> <p>#7: #1 AND #6 <b>6537</b></p> <p>#8: #7 NOT (“Animals”[Mesh] NOT “Humans”[Mesh]) <b>5296</b></p> <p>#9: #8 NOT (“Infant”[Mesh] OR “Child”[Mesh] OR “Adolescent”[Mesh]) NOT “Adult”[Mesh]) <b>4802</b></p> <p>#10: #9 NOT (“Bibliography”[Publication Type] OR “Case Reports”[Publication Type] OR “Congress”[Publication Type] OR “Editorial”[Publication Type] OR “Guideline”[Publication Type] OR “Letter”[Publication Type] OR “Practice Guideline”[Publication Type] OR “Review”[Publication Type] OR “Technical Report”[Publication Type]) <b>3261</b></p> <p>#11: Filter: English <b>2955</b></p> |
| 2.  | Scopus<br>(12 Feb<br>2020) | <p>#1: INDEXTERMS(“Acute Kidney Injury” OR “Kidney/Injuries” OR “Continuous Renal Replacement Therapy”) OR TITLE-ABS(“acute kidney injury” OR “acute renal failure” OR “continuous renal replacement therapy”) <b>77415</b></p> <p>#2: INDEXTERMS(“Nutrition Assessment” OR “Nutritional Status” OR “Protein-Energy Malnutrition” OR “Protein Energy Wasting” OR Malnutrition) OR TITLE-ABS(“nutrition assessment” OR “nutrition status” OR “nutritional status” OR “nutrition risk” OR “nutritional risk” OR malnutrition OR “protein energy wasting” OR “protein-energy malnutrition”) <b>154914</b></p>                                                                                                                                                                                                                                                                                                                                                                                                                                                                                                                                                                                                                                                                                                                                                                                                                                                                                                                                                                                                                                                                                                                                                                                                                                                                                                                                                                                                                                                                                                                                                                                                     |

---

#3: INDEXTERMS(Anthropometry OR “Body Composition” OR “Muscle Strength” OR “Body Weights and Measures”) OR TITLE-ABS(“body weight” OR “body mass” OR “body mass index” OR “muscle mass” OR “body fat”) **649821**

#4: INDEXTERMS(“Blood Proteins”) OR TITLE-ABS(albumin OR prealbumin OR cholesterol) **547401**

#5: INDEXTERMS(Nutrients OR “Dietary Proteins” OR “Enteral Nutrition” OR “Parenteral Nutrition”) OR TITLE-ABS(“energy intake” OR “protein intake” OR macronutrient\* OR micronutrient\* OR trace element\*) **307685**

#6: #2 OR #3 OR #4 OR #5 **1535825**

#7: #1 AND #6 **5891**

#8: INDEXTERMS(Infant OR Child OR Adolescent) **3875741**

#9: #7 AND NOT #8 **5262**

#10: KEY (nonhuman OR animal OR “animal experiment”) **8586541**

#11: #9 AND NOT #10 **2866**

#12: DOCTYPE(ab OR bk OR ch OR bz OR cp OR cr OR dp OR ed OR er OR le OR no OR pr OR rp OR re OR sh)<sup>†</sup> **21779001**

#13: #11 AND NOT #12 **2304**

#14: #13 Limit to: English **2030**

<sup>†</sup>ab-abstract report; bk-book; ch-book chapter; bz-business article; cp-conference paper; cr-conference review; dp-data paper; ed-editorial; er-erratum; le-letter; no-note; pr-press release; rp-report; re-review; sh-short survey

3. Cochrane (12 Feb 2020)
    - #1: MeSH descriptor: [Acute Kidney Injury] explode all trees **1378**
    - #2: "acute kidney injury" OR "acute renal failure" OR "continuous renal replacement therapy" **4456**
    - #3: #1 OR #2 **4483**
    - #4: MeSH descriptor: [Nutrition Assessment] explode all trees **681**
    - #5: MeSH descriptor: [Nutritional Status] explode all trees **2377**
    - #6: MeSH descriptor: [Protein-Energy Malnutrition] explode all trees **248**
    - #7: MeSH descriptor: [Malnutrition] explode all trees **4067**
    - #8: "nutrition assessment" OR "nutritional status" OR "nutrition status" OR "nutritional risk" OR "nutrition risk" OR "protein-energy malnutrition" OR "protein-energy wasting" **7713**
    - #9: #4 OR #5 OR #6 OR #7 OR #8 **10848**
    - #10: MeSH descriptor: [Anthropometry] explode all trees **22817**
    - #11: MeSH descriptor: [Body Composition] explode all trees **4878**
    - #12: MeSH descriptor: [Muscle Strength] explode all trees **5298**
    - #13: MeSH descriptor: [Body Weights and Measures] explode all trees **30943**
    - #14: "body weight" OR "body mass" OR "Body Mass Index" OR "muscle mass" OR "body fat" **90099**
    - #15: #10 OR #11 OR #12 OR #13 OR #14 **106209**
    - #16: MeSH descriptor: [Blood Proteins] explode all trees **51658**
    - #17: MeSH descriptor: [Albumins] explode all trees **7669**
-

---

#18: MeSH descriptor: [Prealbumin] explode all trees **166**  
 #19: MeSH descriptor: [Cholesterol] explode all trees **10017**  
 #20: "albumin" OR "prealbumin" OR "cholesterol" **50159**  
 #21: #16 OR #17 OR #18 #19 OR #20 **96080**  
 #22: MeSH descriptor: [Nutrients] explode all trees **4941**  
 #23: MeSH descriptor: [Dietary Proteins] explode all trees **3943**  
 #24: MeSH descriptor: [Enteral Nutrition] explode all trees **1772**  
 #25: MeSH descriptor: [Parenteral Nutrition] explode all trees **1625**  
 #26: "energy intake" OR "protein intake" OR macronutrient\* OR  
 micronutrient\* OR "trace element\*" **14441**  
 #27: #22 OR #23 OR #24 OR #25 OR #26 **23021**  
 #28: #9 OR #15 OR #21 OR #27 **200784**  
 #29: #3 AND #28 **702**  
 #30: MeSH descriptor: [Infant] explode all trees **15806**  
 #31: MeSH descriptor: [Child] explode all trees **1215**  
 #32: MeSH descriptor: [Adolescent] explode all trees **102290**  
 #33: #30 OR #31 OR #32 **278658**  
 #34: #29 NOT #33 **562<sup>†</sup>**

<sup>†</sup>Cochrane Reviews = 29, Cochrane Protocol = 4, Trials = 528,  
 Clinical Answers = 1

---

Table S2. Protein energy wasting diagnostic criteria

---

Criteria

---

Serum chemistry

Serum albumin < 3.8 g/dL  
 Serum prealbumin < 30 mg/dL  
 Serum cholesterol < 100 mg/dL

Body mass

Body mass index < 23 kg/m<sup>2</sup>  
 Unintentional weight loss over time: 5% over 3 months or 10% over 6 months  
 Total body fat percentage <10%

Muscle mass

Muscle wasting: reduced muscle mass 5% over 3 months or 10% over 6 months  
 Reduced mid0arm muscle circumference area (reduction >10% in relation to 50<sup>th</sup>  
 percentile of reference population)  
 Creatinine appearance

Dietary intake

Unintentional low dietary protein intake < 0.80 g/kg/day for at least 2 months  
 Unintentional low dietary energy intake < 25 kcal/kg/day

---

Table S3. Study selection based on inclusion criteria after reviewing full text

| First author,<br>year | Journal                                              | Title                                                                                                                                                                                | Include? | Reason of Exclusion                           |
|-----------------------|------------------------------------------------------|--------------------------------------------------------------------------------------------------------------------------------------------------------------------------------------|----------|-----------------------------------------------|
| Abel, 1973            | New England Journal of Medicine                      | Improved survival from acute renal failure after treatment with intravenous essential L-amino acids and glucose                                                                      | No       | No analysis on clinical outcomes based on PEW |
| Ahlstrom, 2004        | Clinical Nephrology                                  | Predictive value of interleukin 6,8 and 10 and low HLA-DR expression in acute renal failure                                                                                          | No       | Not PEW                                       |
| Allegretti, 2016      | Digestive Diseases and Sciences                      | Siglec-7 as a Novel Biomarker to Predict Mortality in Decompensated Cirrhosis and Acute Kidney Injury                                                                                | No       | No analysis on clinical outcomes based on PEW |
| Alves, 2013           | Nephrology Dialysis Transplantation                  | Hypomagnesemia as a risk factor for the non-recovery of the renal function in critically ill patients with acute kidney injury                                                       | No       | Not PEW                                       |
| Bagshaw, 2013         | Journal of Critical Care                             | Urine biochemistry in septic and non-septic acute kidney injury: a prospective observational study                                                                                   | No       | Not PEW                                       |
| Basi, 2005            | American Journal of Physiology-Renal Physiology      | Insulin resistance in critically ill patients with acute renal failure                                                                                                               | No       | Not PEW                                       |
| Bell, 2009            | Nephrology Dialysis Transplantation                  | Cystatin C is correlated with mortality in patients with and without acute kidney injury                                                                                             | No       | Not PEW                                       |
| Bellomo, 1997         | Renal Failure                                        | A Prospective Comparative Study of Moderate Versus High Protein Intake for Critically Ill Patients with Acute Renal Failure                                                          | No       | No clinical outcome                           |
| Bellomo, 2014         | Critical Care                                        | Calorie intake and patient outcomes in severe acute kidney injury: findings from The Randomized Evaluation of Normal vs. Augmented Level of Replacement Therapy (RENAL) study trial  | Yes      |                                               |
| Bellomo, 2014         | Blood Purification                                   | Daily Protein Intake and Patient Outcomes in Severe Acute Kidney Injury: Findings of the Randomized Evaluation of Normal versus Augmented Level of Replacement Therapy (RENAL) Trial | Yes      |                                               |
| Berbel, 2014          | Clinics                                              | Nutritional parameters are associated with mortality in acute kidney injury                                                                                                          | Yes      |                                               |
| Biagioni Santos, 2010 | Brazilian Journal of Medical and Biological Research | Hypomagnesemia is a risk factor for nonrecovery of renal function and mortality in AIDS patients with acute kidney injury                                                            | No       | Not PEW                                       |
| Bouchard, 2009        | Kidney International                                 | Fluid accumulation, survival and recovery of kidney function in critically ill patients with acute kidney injury                                                                     | No       | No analysis on clinical outcomes based on PEW |

| First author,<br>year | Journal                                                  | Title                                                                                                                                                                                                                                                                           | Include? | Reason of Exclusion                           |
|-----------------------|----------------------------------------------------------|---------------------------------------------------------------------------------------------------------------------------------------------------------------------------------------------------------------------------------------------------------------------------------|----------|-----------------------------------------------|
| Bufarah, 2018         | Clinical Nutrition<br>ESPEN                              | Low caloric and protein intake is associated with mortality in patients with acute kidney injury                                                                                                                                                                                | Yes      |                                               |
| Cerda, 2009           | Nephrology Dialysis<br>Transplantation                   | In severe acute kidney injury, a higher serum creatinine is paradoxically associated with better patient survival                                                                                                                                                               | No       | Not a full length article                     |
| Chen, 2012            | PLoS One                                                 | Acute Kidney Injury Biomarkers for Patients in a Coronary Care Unit: A Prospective Cohort Study                                                                                                                                                                                 | No       | Non-AKI population                            |
| Chen, 2015            | Critical Care                                            | Fluid overload at start of continuous renal replacement therapy is associated with poorer clinical condition and outcome: a prospective observational study on the combined use of bioimpedance vector analysis and serum N-terminal pro-B-type natriuretic peptide measurement | No       | Not PEW                                       |
| Chewtow, 1998         | Journal of American<br>Society of Nephrology             | Predictors of mortality and the provision of dialysis in patients with acute tubular necrosis                                                                                                                                                                                   | Yes      |                                               |
| Chuasuan, 2006        | Journal of the Medical<br>Association of<br>Thailand     | Continuous Veno-Venous Hemofiltration in Bhumibol Adulyadej Hospital                                                                                                                                                                                                            | No       | Retrospective study                           |
| Coca, 2014            | Journal of American<br>Society of Nephrology             | Urinary Biomarkers of AKI and Mortality 3 Years after Cardiac Surgery                                                                                                                                                                                                           | No       | Not PEW                                       |
| Costa, 2018           | Bioscience Reports                                       | Protein carbonyl concentration as a biomarker for development and mortality in sepsis-induced acute kidney injury                                                                                                                                                               | No       | Not PEW                                       |
| Danziger, 2016        | Critical Care Medicine                                   | Obesity, Acute Kidney Injury, and Mortality in Critical Illness                                                                                                                                                                                                                 | No       | Retrospective study                           |
| de Souza, 2014        | Jornal Brasileiro de<br>Nefrologia                       | Inverse association between serum creatinine and mortality in acute kidney injury                                                                                                                                                                                               | No       | Not PEW                                       |
| Demirjian, 2011       | Nephrology Dialysis<br>Transplantation                   | Hypophosphatemia during continuous hemodialysis is associated with prolonged respiratory failure in patients with acute kidney injury                                                                                                                                           | Yes      |                                               |
| Demirjian, 2011       | Clinical Journal of<br>American Society of<br>Nephrology | Model to Predict Mortality in Critically Ill Adults with Acute Kidney Injury                                                                                                                                                                                                    | No       | No analysis on clinical outcomes based on PEW |
| Dharan, 2005          | Renal Failure                                            | Prediction of Mortality in Acute Renal Failure in the Tropics                                                                                                                                                                                                                   | No       | Doubtful results                              |
| Dimitrijevic,         | The Tohoku Journal of                                    | Elevated Serum Ferritin Levels Are Predictive of Renal Function                                                                                                                                                                                                                 | No       | Not PEW                                       |

| First author,<br>year | Journal                                               | Title                                                                                                                                 | Include? | Reason of Exclusion                           |
|-----------------------|-------------------------------------------------------|---------------------------------------------------------------------------------------------------------------------------------------|----------|-----------------------------------------------|
| 2019                  | Experimental<br>Medicine                              | Recovery among Patients with Acute Kidney Injury                                                                                      |          |                                               |
| Doig, 2015            | Intensive Care<br>Medicine                            | Intravenous amino acid therapy for kidney function in critically ill patients: a randomized controlled trial                          | No       | No analysis on clinical outcomes based on PEW |
| Druml, 2010           | Intensive Care<br>Medicine                            | Impact of body mass on incidence and prognosis of acute kidney injury requiring renal replacement therapy                             | No       | Retrospective study                           |
| Feinstein, 1981       | Medicine                                              | Clinical and metabolic responses to parenteral nutrition in acute renal failure                                                       | No       | No analysis on clinical outcomes based on PEW |
| Fiaccadori, 1999      | Journal of American<br>Society of Nephrology          | Prevalence and Clinical Outcome Associated with Preexisting Malnutrition in Acute Renal Failure: A Prospective Cohort Study           | Yes      |                                               |
| Ficek, 2006           | Kidney & Blood<br>Pressure Research                   | Plasma Concentrations of Tumor Necrosis Factor Alpha May Predict the Outcome of Patients with Acute Renal Failure                     | No       | No analysis on clinical outcomes based on PEW |
| Franklin, 1997        | American Journal of<br>Physiology-Renal<br>Physiology | Insulin-like Growth Factor I Preserves Renal Function Postoperatively                                                                 | No       | Not PEW                                       |
| Fulop, 2010           | ASAIO Journal                                         | Volume-Related Weight Gain and Subsequent Mortality in Acute Renal Failure Patients Treated With Continuous Renal Replacement Therapy | No       | No analysis on clinical outcomes based on PEW |
| de Goes, 2018         | Nutrients                                             | Evaluation of Factors Associated with Hypermetabolism and Hypometabolism in Critically Ill AKI Patients                               | Yes      |                                               |
| Gong, 2012            | Archives of<br>Gerontology and<br>Geriatrics          | Elderly patients with acute kidney injury (AKI): Clinical features and risk factors for mortality                                     | Yes      |                                               |
| Gong, 2019            | Clinical Interventions<br>in Aging                    | Can Serum Nutritional Related Biomarkers Predict Mortality Of Critically Ill Older Patients With Acute Kidney Injury?                 | No       | No analysis on clinical outcomes based on PEW |
| Guimaraes, 2008       | Critical Care Medicine                                | Low insulin-like growth factor-1 and hypocholesterolemia as mortality predictors in acute kidney injury in the intensive care unit    | Yes      |                                               |
| Gunay, 2018           | Northern Clinics of<br>Istanbul                       | Increase of endocan, a new marker for inflammation and endothelial dysfunction, in acute kidney injury                                | No       | No analysis on clinical outcomes based on PEW |
| Gunstm 2013           | Journal of American<br>Society of Nephrology          | Impact of Early Parenteral Nutrition on Metabolism and Kidney Injury                                                                  | No       | No analysis on clinical outcomes based on PEW |

| First author,<br>year    | Journal                            | Title                                                                                                                                                                               | Include? | Reason of Exclusion                           |
|--------------------------|------------------------------------|-------------------------------------------------------------------------------------------------------------------------------------------------------------------------------------|----------|-----------------------------------------------|
| Hall, 2018               | BMC Nephrology                     | suPAR as a marker of infection in acute kidney injury – a prospective observational study                                                                                           | No       | Not PEW                                       |
| Hamzic-Mehmedbasic, 2016 | Journal of Renal Injury Prevention | Prognostic indicators of adverse renal outcome and death in acute kidney injury hospital survivors                                                                                  | No       | No analysis on clinical outcomes based on PEW |
| Han, 2014                | Journal of Critical Care           | Mean platelet volume is a prognostic factor in patients with acute kidney injury requiring continuous renal replacement therapy                                                     | No       | Retrospective study                           |
| Hsu, 2020                | JAMA Internal Medicine             | Post-Acute Kidney Injury Proteinuria and Subsequent Kidney Disease Progression The Assessment, Serial Evaluation, and Subsequent Sequelae in Acute Kidney Injury (ASSESS-AKI) Study | No       | Not PEW                                       |
| Huang, 2013              | PLoS One                           | Procalcitonin Levels Predict Acute Kidney Injury and Prognosis in Acute Pancreatitis: A Prospective Study                                                                           | No       | Not PEW                                       |
| Huelin, 2019             | Hepatology                         | Neutrophil Gelatinase-Associated Lipocalin for Assessment of Acute Kidney Injury in Cirrhosis: A Prospective Study                                                                  | No       | No analysis on clinical outcomes based on PEW |
| Iglesias, 2003           | American Journal of Kidney Disease | Elevated Serum Levels of the Type I and Type II Receptors for Tumor Necrosis Factor- $\alpha$ as Predictive Factors for ARF in Patients With Septic Shock                           | No       | No analysis on clinical outcomes based on PEW |
| Jaques, 2018             | Nephrology                         | Biomarkers for acute kidney injury in decompensated cirrhosis: a retrospective study                                                                                                | No       | Not PEW                                       |
| Jeong, 2013              | Renal Failure                      | Role of B-type natriuretic peptide as a marker of mortality in acute kidney injury patients treated with continuous renal replacement therapy                                       | No       | No analysis on clinical outcomes based on PEW |
| Jung, 2016               | Medicine                           | Electrolyte and mineral disturbances in septic acute kidney injury patients undergoing continuous renal replacement therapy                                                         | No       | Not PEW                                       |
| Jung, 2018               | PLoS One                           | Phosphate is a potential biomarker of disease severity and predicts adverse outcomes in acute kidney injury patients undergoing continuous renal replacement therapy                | No       | Not PEW                                       |
| Kadiroglu, 2007          | Renal Failure                      | The Evaluation of Effects of Demographic Features, Biochemical Parameters, and Cytokines on Clinical Outcomes in Patients with Acute Renal Failure                                  | No       | No analysis on clinical outcomes based on PEW |
| Kim, 2015                | Journal of Nutrition               | The effect of nutritional supply on clinical outcomes and nutritional status                                                                                                        | No       | Non English language                          |

| First author,<br>year | Journal                                                           | Title                                                                                                                                                                                                                    | Include? | Reason of Exclusion                           |
|-----------------------|-------------------------------------------------------------------|--------------------------------------------------------------------------------------------------------------------------------------------------------------------------------------------------------------------------|----------|-----------------------------------------------|
| Kim, 2017             | and Health<br>Kidney Research and<br>Clinical Practice            | in critically ill patients receiving continuous renal replacement therapy<br>Body mass index is inversely associated with mortality in patients with acute kidney injury undergoing continuous renal replacement therapy | No       | Retrospective study                           |
| Kim, 2017             | PLoS One                                                          | Fluid overload and survival in critically ill patients with acute kidney injury receiving continuous renal replacement therapy                                                                                           | No       | Retrospective study                           |
| Kim, 2018             | Kidney & Blood<br>Pressure Research                               | A Prospective Observational Study on the Predictive Value of Serum Cystatin C for Successful Weaning from Continuous Renal Replacement Therapy                                                                           | No       | Not PEW                                       |
| Kim, 2018             | BMC Nephrology                                                    | The impact of disease severity on paradoxical association between body mass index and mortality in patients with acute kidney injury undergoing continuous renal replacement therapy                                     | No       | Retrospective study                           |
| Kocyigit, 2013        | Turkish Nephrology,<br>Dialysis and<br>Transplantation<br>Journal | Trends in acute renal failure in central Anatolia                                                                                                                                                                        | No       | Inclusion of patients < 18 years old          |
| Kohli, 2007           | International Urology<br>Nephrology                               | Predictors of mortality in elderly patients with acute renal failure in a developing country                                                                                                                             | No       | Not PEW                                       |
| Kolyada, 2009         | Kidney International                                              | A genetic variant of hypoxia-inducible factor-1a is associated with adverse outcomes in acute kidney injury                                                                                                              | No       | Not PEW                                       |
| Kopple, 1982          | Proc EDTA                                                         | Current problems in amino acid therapy for acute renal failure                                                                                                                                                           | No       | No analysis on clinical outcomes based on PEW |
| Koyner, 2012          | Journal of American<br>Society of Nephrology                      | Biomarkers Predict Progression of Acute Kidney Injury after Cardiac Surgery                                                                                                                                              | No       | Not PEW                                       |
| Koyner, 2015          | Journal of American<br>Society of Nephrology                      | Furosemide Stress Test and Biomarkers for the Prediction of AKI Severity                                                                                                                                                 | No       | Not PEW                                       |
| Kritmetapak, 2016     | PLoS One                                                          | The Impact of Macro-and Micronutrients on Predicting Outcomes of Critically Ill Patients Requiring Continuous Renal Replacement Therapy                                                                                  | Yes      |                                               |
| Kumpers, 2010         | Intensive Care<br>Medicine                                        | Angiopoietin-2 in patients requiring renal replacement therapy in the ICU: relation to acute kidney injury, multiple organ dysfunction syndrome and outcome                                                              | No       | Not PEW                                       |



| First author,<br>year | Journal                                            | Title                                                                                                                                                            | Include? | Reason of Exclusion                           |
|-----------------------|----------------------------------------------------|------------------------------------------------------------------------------------------------------------------------------------------------------------------|----------|-----------------------------------------------|
| Kumpers, 2010         | Critical Care                                      | Serum neutrophil gelatinase-associated lipocalin at inception of renal replacement therapy predicts survival in critically ill patients with acute kidney injury | No       | Not PEW                                       |
| Kurtin, 1987          | American Journal of Kidney Disease                 | Profound hypophosphatemia in the course of acute renal failure                                                                                                   | No       | Not PEW                                       |
| Lai, 2013             | PLoS One                                           | Is the Serum Vitamin D Level at the Time of Hospital-Acquired Acute Kidney Injury Diagnosis Associated with Prognosis?                                           | No       | Not PEW                                       |
| Leaf, 2013            | Clinical Journal of American Society of Nephrology | FGF-23 Levels in Patients with AKI and Risk of Adverse Outcomes                                                                                                  | No       | Not PEW                                       |
| Leaf, 2013            | Clinical Endocrinology                             | Dysregulated mineral metabolism in patients with acute kidney injury and risk of adverse outcomes                                                                | No       | Not PEW                                       |
| Leaf, 2018            | Clinical Journal of American Society of Nephrology | Fibroblast Growth Factor 23 Associates with Death in Critically Ill Patients                                                                                     | No       | Not PEW                                       |
| Leaf, 2019            | Journal of American Society of Nephrology          | Iron, Heparin, and Death in Human AKI                                                                                                                            | No       | Not PEW                                       |
| Leblanc, 1998         | American Journal of Kidney Disease                 | Catabolism in Critical Illness: Estimation From Urea Nitrogen Appearance and Creatinine Production During Continuous Renal Replacement Therapy                   | No       | No analysis on clinical outcomes based on PEW |
| Leonard, 1975         | Urology                                            | Parenteral essential amino acids in acute renal failure                                                                                                          | No       | Not PEW                                       |
| Li, 2010              | BMC Nephrology                                     | Malnutrition and inflammation in acute kidney injury due to earthquake-related crush syndrome                                                                    | No       | No analysis on clinical outcomes based on PEW |
| Li, 2019              | Aging Clinical and Experimental Research           | Analysis of the short-term prognosis and risk factors of elderly acute kidney injury patients in different KDIGO diagnostic windows                              | No       | Retrospective study                           |
| Lin, 2009             | The American Journal of Surgery                    | The 90-day mortality and the subsequent renal recovery in critically ill surgical patients requiring acute renal replacement therapy                             | Yes      |                                               |
| Lin, 2013             | PLoS One                                           | Serum Interleukin-18 at Commencement of Renal Replacement Therapy Predicts Short-Term Prognosis in Critically Ill Patients with Acute Kidney Injury              | No       | No analysis on clinical outcomes based on PEW |

| First author,<br>year | Journal                                            | Title                                                                                                                                                                                         | Include? | Reason of Exclusion                           |
|-----------------------|----------------------------------------------------|-----------------------------------------------------------------------------------------------------------------------------------------------------------------------------------------------|----------|-----------------------------------------------|
| Lin, 2019             | Bosnian Journal of Basic Medical Sciences          | Expression patterns and prognostic value of miR-210, miR-494, and miR-205 in middle-aged and old patients with sepsis-induced acute kidney injury                                             | No       | No analysis on clinical outcomes based on PEW |
| Lins, 2000            | Clinical Nephrology                                | Prognostic value of a new scoring system for hospital mortality in acute renal failure                                                                                                        | Yes      |                                               |
| Lins, 2004            | Nephrology Dialysis Transplantation                | Re-evaluation and modification of the Stuivenberg Hospital Acute Renal Failure (SHARF) scoring system for the prognosis of acute renal failure: an independent multicentre, prospective study | No       | No analysis on clinical outcomes based on PEW |
| Liu, 2017             | BMC Nephrology                                     | Surfactant protein-D (SP-D) gene polymorphisms and serum level as predictors of susceptibility and prognosis of acute kidney injury in the Chinese population                                 | No       | Not PEW                                       |
| Lorenzen, 2017        | Nephrology Dialysis Transplantation                | Osteopontin predicts survival in critically ill patients with acute kidney injury                                                                                                             | No       | No analysis on clinical outcomes based on PEW |
| Mahajan, 2006         | Renal Failure                                      | Spectrum of Acute Renal Failure and Factors Predicting Its Outcome in an Intensive Care Unit in India                                                                                         | No       | No analysis on clinical outcomes based on PEW |
| Malbouisson, 2019     | Einstein                                           | Lipid profile and statin use in critical care setting: implications for kidney outcome                                                                                                        | No       | No analysis on clinical outcomes based on PEW |
| Mault, 1983           | ASAIO Journal                                      | Starvation: a major contribution to mortality in acute renal failure?                                                                                                                         | No       | Not PEW                                       |
| McMahon, 2019         | American Journal of Nephrology                     | Biomarker Predictors of Adverse Acute Kidney Injury Outcomes in Critically Ill Patients: The Dublin Acute Biomarker Group Evaluation Study                                                    | No       | Not PEW                                       |
| Meersch, 2018         | Journal of American Society of Nephrology          | Long-Term Clinical Outcomes after Early Initiation of RRT in Critically Ill Patients with AKI                                                                                                 | No       | Not PEW                                       |
| Mendu, 2017           | Clinical Journal of American Society of Nephrology | A Decision-Making Algorithm for Initiation and Discontinuation of RRT in Severe AKI                                                                                                           | Yes      |                                               |
| Murugan, 2014         | Nephrology Dialysis Transplantation                | Plasma inflammatory and apoptosis markers are associated with dialysis dependence and death among critically ill patients receiving renal replacement therapy                                 | No       | Not PEW                                       |
| Murugan,              | Clinical Journal of                                | Associations between Intensity of RRT, Inflammatory Mediators, and                                                                                                                            | No       | Not PEW                                       |

| First author,<br>year | Journal                                            | Title                                                                                                                                                                                                                                                                                   | Include? | Reason of Exclusion |
|-----------------------|----------------------------------------------------|-----------------------------------------------------------------------------------------------------------------------------------------------------------------------------------------------------------------------------------------------------------------------------------------|----------|---------------------|
| 2015                  | American Society of Nephrology                     | Outcomes                                                                                                                                                                                                                                                                                |          |                     |
| Murugan, 2018         | Critical Care                                      | Net ultrafiltration intensity and mortality in critically ill patients with fluid overload                                                                                                                                                                                              | No       | Not PEW             |
| Murugan, 2019         | JAMA Network Open                                  | Association of Net Ultrafiltration Rate With Mortality Among Critically Ill Adults With Acute Kidney Injury Receiving Continuous Venovenous Hemodiafiltration A Secondary Analysis of the Randomized Evaluation of Normal vs Augmented Level (RENAL) of Renal Replacement Therapy Trial | No       | Not PEW             |
| Pedersen, 2017        | Osteoporosis International                         | Impact of body mass index on risk of acute kidney injury and mortality in elderly patients undergoing hip fracture surgery                                                                                                                                                              | No       | Retrospective study |
| Pike, 2015            | Clinical Journal of American Society of Nephrology | Biomarker Enhanced Risk Prediction for Adverse Outcomes in Critically Ill Patients Receiving RRT                                                                                                                                                                                        | No       | Not PEW             |
| Prabhu, 2016          | Clinical Nephrology                                | Fever, thrombocytopenia, and AKI-A profile of malaria, dengue, and leptospirosis with renal failure in a South Indian tertiary-care hospital                                                                                                                                            | No       | Not PEW             |
| Qian, 2015            | Kidney & Blood Pressure Research                   | Serum Protein Thiol Levels in Patients with Hospital-Acquired Acute Kidney Injury                                                                                                                                                                                                       | No       | Not PEW             |
| Quinto, 2015          | Cytokine                                           | TNF- $\alpha$ depuration is a predictor of mortality in critically ill patients under continuous veno-venous hemodiafiltration treatment                                                                                                                                                | No       | Not PEW             |
| Sakan, 2018           | Therapeutic Apheresis and Dialysis                 | Consequence of Elevated Fibroblast Growth Factor 23 Levels in Acute Kidney Injury, Renal Recovery and Overall Survival in Intensive Care Unit Patients After Major Surgery                                                                                                              | No       | Not PEW             |
| Salahudeen, 2009      | Clinical Journal of American Society of Nephrology | Sustained Low Efficiency Dialysis in the Continuous Mode (C-SLED): Dialysis Efficacy, Clinical Outcomes, and Survival Predictors in Critically Ill Cancer Patients                                                                                                                      | No       | Retrospective study |
| Saly, 2017            | PLoS One                                           | Approaches to Predicting Outcomes in Patients with Acute Kidney Injury                                                                                                                                                                                                                  | No       | Not PEW             |
| Scheinkestel, 2003    | Nutrition                                          | Prospective Randomized Trial to Assess Caloric and Protein Needs of Critically Ill, Anuric, Ventilated Patients Requiring Continuous Renal Replacement Therapy                                                                                                                          | No       | Non-AKI population  |

| First author, year      | Journal                             | Title                                                                                                                                                                                           | Include? | Reason of Exclusion                           |
|-------------------------|-------------------------------------|-------------------------------------------------------------------------------------------------------------------------------------------------------------------------------------------------|----------|-----------------------------------------------|
| Sever, 2002             | Nephrology Dialysis Transplantation | The Marmara earthquake: admission laboratory features of patients with nephrological problems                                                                                                   | No       | No analysis on clinical outcomes based on PEW |
| Sezer, 2006             | Acta Medica                         | Predictors of mortality in patients with acute renal failure                                                                                                                                    | No       | Age range: 15-90 years old                    |
| Sezer, 2008             | Journal of Renal Nutrition          | Relevance of Nutritional Route and Intercellular Adhesion Molecule-1 in Patients With Acute Renal Failure and Its Prognostic Implications                                                       | Yes      |                                               |
| Shiao, 2017             | PLoS One                            | Perioperative body weight change is associated with in-hospital mortality in cardiac surgical patients with postoperative acute kidney injury                                                   | No       | Not PEW                                       |
| Shum, 2016              | Renal Failure                       | Septic acute kidney injury in critically ill patients – a single-center study on its incidence, clinical characteristics, and outcome predictors                                                | No       | Retrospective study                           |
| Simmons, 2004           | Kidney International                | Plasma cytokine levels predict mortality in patients with acute renal failure                                                                                                                   | No       | Not PEW                                       |
| Sole, 2019              | Liver International                 | Characterization of inflammatory response in hepatorenal syndrome: Relationship with kidney outcome and survival                                                                                | No       | Not PEW                                       |
| Srisawat, 2011          | Kidney International                | Plasma neutrophil gelatinase-associated lipocalin predicts recovery from acute kidney injury following community-acquired pneumonia                                                             | No       | Not PEW                                       |
| Stads, 2018             | PLoS One                            | Fluid balance-adjusted creatinine at initiation of continuous venovenous hemofiltration and mortality. A post-hoc analysis of a multicenter randomized controlled trial                         | No       | Not PEW                                       |
| Valdivieso, 2008        | Journal of Renal Nutrition          | Impact of Prealbumin Levels on Mortality in Patients With Acute Kidney Injury: An Observational Cohort Study                                                                                    | No       | Age range: 16-90 years old                    |
| Van Den Noortgate, 2003 | Nephrology Dialysis Transplantation | Outcome in a post-cardiac surgery population with acute renal failure requiring dialysis: does age make a difference?                                                                           | No       | Retrospective study                           |
| Wang, 2006              | Renal Failure                       | Early Prognostic Factors in Patients with Acute Renal Failure Requiring Dialysis                                                                                                                | No       | No analysis on clinical outcomes based on PEW |
| Wang, 2017              | Oncotarget                          | Effects of continuous renal replacement therapy on serum cytokines, neutrophil gelatinase-associated lipocalin, and prognosis in patients with severe acute kidney injury after cardiac surgery | No       | Not PEW                                       |
| Wang, 2017              | Scientific Reports                  | Serum prealbumin and its changes over time are associated with mortality                                                                                                                        | Yes      |                                               |

| First author,<br>year | Journal                           | Title                                                                                                                                                                                    | Include? | Reason of Exclusion                           |
|-----------------------|-----------------------------------|------------------------------------------------------------------------------------------------------------------------------------------------------------------------------------------|----------|-----------------------------------------------|
|                       |                                   | in acute kidney injury                                                                                                                                                                   |          |                                               |
| Woodward, 2019        | Critical Care Medicine            | Fluid Overload Associates With Major Adverse Kidney Events in Critically Ill Patients With Acute Kidney Injury Requiring Continuous Renal Replacement Therapy                            | No       | Retrospective study                           |
| Wu, 2019              | Frontiers in Immunology           | Effects of changes in the levels of damage-associated molecular patterns following continuous veno-venous hemofiltration therapy on outcomes in acute kidney injury patients with sepsis | No       | Not PEW                                       |
| Xavier, 2016          | Clinical Nutrition ESPEN          | Handgrip strength and weight predict long-term mortality in acute kidney injury patients                                                                                                 | No       | AKI survivors only                            |
| Xie, 2011             | BMC Nephrology                    | The ratio of CRP to prealbumin levels predict mortality in patients with hospital-acquired acute kidney injury                                                                           | Yes      |                                               |
| Yang, 2018            | Artificial Organs                 | Predictive Factors Upon Discontinuation of Renal Replacement Therapy for Long-Term Chronic Dialysis and Death in Acute Kidney Injury Patients                                            | No       | Not PEW                                       |
| You, 2018             | Clinical Interventions in Aging   | Association of prealbumin levels with contrast-induced acute kidney injury in elderly patients with elective percutaneous coronary intervention                                          | No       | Non-AKI population                            |
| Zarbock, 2016         | JAMA                              | Effect of Early vs Delayed Initiation of Renal Replacement Therapy on Mortality in Critically Ill Patients With Acute Kidney Injury The ELAIN Randomized Clinical Trial                  | No       | Not PEW                                       |
| Zhang, 2017           | Journal of Investigative Medicine | Nutritional status plays a crucial role in the mortality of critically ill patients with acute renal failure                                                                             | No       | Retrospective study                           |
| Zheng, 2014           | BioMed Research International     | Metabolic Acidosis and Strong Ion Gap in Critically Ill Patients with Acute Kidney Injury                                                                                                | No       | No analysis on clinical outcomes based on PEW |
| Zhu, 2018             | Critical Care Medicine            | The Effect of IV Amino Acid Supplementation on Mortality in ICU Patients May Be Dependent on Kidney Function: Post Hoc Subgroup Analyses of a Multicenter Randomized Trial               | No       | Non-AKI population                            |
| Zou, 2018             | Cardio Renal Medicine             | Role of Body Mass Index in Acute Kidney Injury Patients after Cardiac Surgery                                                                                                            | No       | Retrospective study                           |
| Zou, 2019             | Internal Medicine Journal         | Serum Prealbumin is prognostic for All-cause Mortality in Patients with Community-acquired and Post-operative Acute Kidney Injury                                                        | No       | Retrospective study                           |

Table S4. Summary of studies included in the review (additional information)

| Author, year     | Diagnostic criteria of AKI | Stage of AKI                              | Primary cause of AKI                                                        | Type of KRT            | Comorbidities                                       | Disease severity score           | Inflammatory markers |
|------------------|----------------------------|-------------------------------------------|-----------------------------------------------------------------------------|------------------------|-----------------------------------------------------|----------------------------------|----------------------|
| Bellomo 2014     | Predefined criteria        | NA                                        | NA                                                                          | CVVHDF                 | Sepsis: 49.3%                                       | APACHE III: 102.5                | NA                   |
| Berbel, 2014     | AKIN                       | AKIN 1: 11%<br>AKIN 2: 43%<br>AKIN 3: 46% | Ischemic: 49.6%<br>Nephrotoxic: 15.8%<br>Mixed: 34.6%                       | HD: 41.4%<br>PD: 16.5% | Sepsis: 31%<br>DM: 21%<br>CKD: 23%<br>Oliguria: 22% | ATN-ISS: 0.46                    | CRP: 14.4 mg/dL      |
| Bufarah, 2018    | AKIN                       | NA                                        | Ischemic: 55.3%<br>Nephrotoxic: 9.9%<br>Septic: 10.1%<br>Mixed: 24.7%       | HD or HVPD             | DM: 25.5%<br>CKD: 30.1%                             | NA                               | CRP: 15.8 mg/dL      |
| Chertow, 1998    | NA                         | NA                                        | ATN: 100%                                                                   | NA                     | Sepsis: 30%<br>Infection: 47%<br>DM: 28%            | NA                               | NA                   |
| de Goes, 2018    | KDIGO                      | Stage 3                                   | Septic: 80%<br>Ischemic: 13%<br>Nephrotoxicity: 5%<br>Mixed: 2%             | NA                     | Sepsis: 47.6%<br>CVD: 32.3%                         | ATN-ISS: 0.65                    | CRP: 26.5 mg/dL      |
| Demirjian, 2011  | NA                         | NA                                        | ATN: 56.1%<br>Multifactorial: 35.2%<br>Other: 8.7%                          | CVVHD                  | CKD: 35.5%<br>DM: 14.6%                             | APACHE II: 24                    | NA                   |
| Fiaccadori, 1999 | Predefined criteria        | NA                                        | Medical AKI: 73%<br>Surgical AKI: 27%                                       | HD or CRRT             | Sepsis: 23.3%<br>Oliguria: 66%<br>DM: 12%           | APACHE II: 23.1                  | NA                   |
| Gong, 2012       | RIFLE                      | Rc: 19.2%<br>Ic: 31.3%<br>Fc: 49.5%       | Ischemic: 53.5%<br>Surgical: 33.3%<br>Septic: 10.1%<br>Nephrotoxicity: 3.0% | NA                     | Sepsis/ inflection: 29.3%<br>MODS: 38.4%            | APACHE II: 17.0<br>ATN-ISS: 0.34 | CRP: 6.9 mg/dL       |

|                   |                     |                                     |                                                                                         |                                       |                                                                |                                       |                 |
|-------------------|---------------------|-------------------------------------|-----------------------------------------------------------------------------------------|---------------------------------------|----------------------------------------------------------------|---------------------------------------|-----------------|
| Guimaraes, 2008   | Predefined criteria | NA                                  | Ischemic: 69.6%<br>Multifactorial: 28.6%<br>Nephrotoxicity: 1.8%<br>Surgical AKI: 55.3% | NA                                    | Sepsis: 64.3%<br>Multi-organ failure: 60.7%<br>Oliguria: 32.1% | SOFA: 6<br>APACHE II: 21<br>SOFA: 9.1 | NA              |
| Kritmetapak, 2016 | NA                  | NA                                  | Septic: 54.3%<br>Ischemic: 40.0%<br>Nephrotoxic: 1.4%<br>Multifactorial: 4.3%           | CRRT                                  | DM: 31.4%<br>Liver disease: 27.1%<br>Malignancy: 24.3%         | APACHE II: 20.4<br>SOFA: 10.9         | CRP: 11.5 mg/dL |
| Lin, 2009         | RIFLE               | Rc: 8.5%<br>Ic: 9.1%<br>Fc: 82.5%   | Shock: 65.7%<br>Sepsis: 36.4%<br>Contrast nephropathy: 2.3%                             | IHD: 29.2%<br>CRRT: 20.8%             | CKD: 72.5%                                                     | APACHE II: 12.4<br>SOFA: 11.8         | NA              |
| Lins, 2000        | Predefined criteria | NA                                  | Medical other: 77%<br>Medical toxic: 15%<br>Surgical: 8%                                | NA                                    | NA                                                             | NA                                    | NA              |
| Mendu, 2017       | NA                  | NA                                  | Hypotension: 58%<br>Sepsis: 51%<br>Prerenal azotemia: 30%                               | CVVH: 25%<br>HD: 9%<br>CVVH & HD: 15% | Malignancy: 39%                                                | NA                                    | NA              |
| Sezer, 2008       | Predefined criteria | NA                                  | Ischemic ATN: 66%<br>Nephrotoxic ATN: 19%<br>Acute GN: 9%                               | NA                                    | Infection: 75%                                                 | APACHE III: 64                        | NA              |
| Wang, 2017        | RIFLE               | Rc: 60.0%<br>Ic: 22.6%<br>Fc: 17.4% | Pre-renal: 39.7%<br>Renal: 27.4%<br>Pre-renal & renal: 32.9%                            | CRRT                                  | Sepsis: 17.1%<br>Heart failure: 17.9%<br>DM: 7.9%              | APACHE II: 14                         | hsCRP: 7.0 mg/L |
| Xie, 2011         | RIFLE               | Rc: 45.8%<br>Ic: 24.5%<br>Fc: 29.7% | Ischemic: 42.6%<br>Multifactorial: 37.4%<br>Nephrotoxic: 20%                            | NA                                    | Sepsis: 43.8%<br>DM: 16.9%<br>CKD: 6.8%                        | SOFA: 7                               | CRP: 6.6 mg/dL  |

Abbreviations: AKI, acute kidney injury; AKIN, Acute Kidney Injury Network; APACHE, acute physiologic assessment and chronic health evaluation; ATN-ISS, acute tubular necrosis-index severity score; CKD, chronic kidney disease; CRP, C-reactive protein; CRRT, continuous renal replacement therapy; CVD, cardiovascular disease; CVVH, continuous venovenous hemodialysis; CVVHDF, continuous venovenous hemodiafiltration; DM, diabetes mellitus; HD, hemodialysis; hsCRP, high sensitivity C-reactive protein; Fc, class Failure; HVPD, high volume peritoneal dialysis; Ic, class Injury; IHD, intermittent hemodialysis; KDIGO, Kidney Disease Improving Global Outcomes; KRT, kidney replacement therapy; NA, not available; Rc, class Risk; RIFLE, Risk, Injury, Failure, Loss, End Stage Renal Disease; SOFA, Sequential Organ Failure Assessment.



Table S5. Quality assessment of studies included in the review

| Author, year      | Representativeness<br>of exposed cohort | Selection of non-<br>exposed cohort | Ascertainment<br>of exposure | Outcome absent<br>at start of study | Comparability of<br>cohorts | Assessment of<br>outcome | Adequate duration<br>of follow up | Completeness of<br>follow up |
|-------------------|-----------------------------------------|-------------------------------------|------------------------------|-------------------------------------|-----------------------------|--------------------------|-----------------------------------|------------------------------|
| Bellomo, 2014     | 1                                       | 1                                   | 1                            | 1                                   | 2                           | 1                        | 1                                 | 1                            |
| Berbel, 2014      | Unclear                                 | 1                                   | 1                            | 1                                   | 2                           | 1                        | Unclear                           | 1                            |
| Bufarah, 2018     | Unclear                                 | 1                                   | 1                            | 1                                   | 1                           | 1                        | Unclear                           | Unclear                      |
| Chertow, 1998     | 1                                       | 1                                   | 1                            | 1                                   | 2                           | 1                        | 1                                 | 1                            |
| Demirjian, 2011   | Unclear                                 | 1                                   | 1                            | 1                                   | 1                           | 1                        | 1                                 | 1                            |
| Fiaccadori, 1999  | 1                                       | 1                                   | 1                            | 1                                   | 2                           | 1                        | 1                                 | 1                            |
| de Goes, 2018     | Unclear                                 | 1                                   | 1                            | 1                                   | 1                           | 1                        | 1                                 | 1                            |
| Gong, 2012        | Unclear                                 | 1                                   | 1                            | 1                                   | 2                           | 1                        | Unclear                           | 1                            |
| Guimaraes, 2008   | 1                                       | 1                                   | 1                            | 1                                   | 1                           | 1                        | 1                                 | 1                            |
| Kritmetapak, 2016 | 1                                       | 1                                   | 1                            | 1                                   | 1                           | 1                        | 1                                 | 1                            |
| Lin, 2009         | 1                                       | 1                                   | 1                            | 1                                   | 2                           | 1                        | 1                                 | 1                            |
| Lins, 2000        | Unclear                                 | 1                                   | 1                            | 1                                   | 1                           | 1                        | Unclear                           | 1                            |
| Mendu, 2017       | Unclear                                 | 1                                   | 1                            | 1                                   | 1                           | 1                        | 1                                 | 1                            |
| Sezer, 2008       | Unclear                                 | 1                                   | 1                            | 1                                   | 1                           | 1                        | Unclear                           | 1                            |
| Wang, 2017        | 1                                       | 1                                   | 1                            | 1                                   | 2                           | 1                        | 1                                 | 1                            |
| Xie, 2011         | Unclear                                 | 1                                   | 1                            | 1                                   | 2                           | 1                        | 1                                 | 1                            |

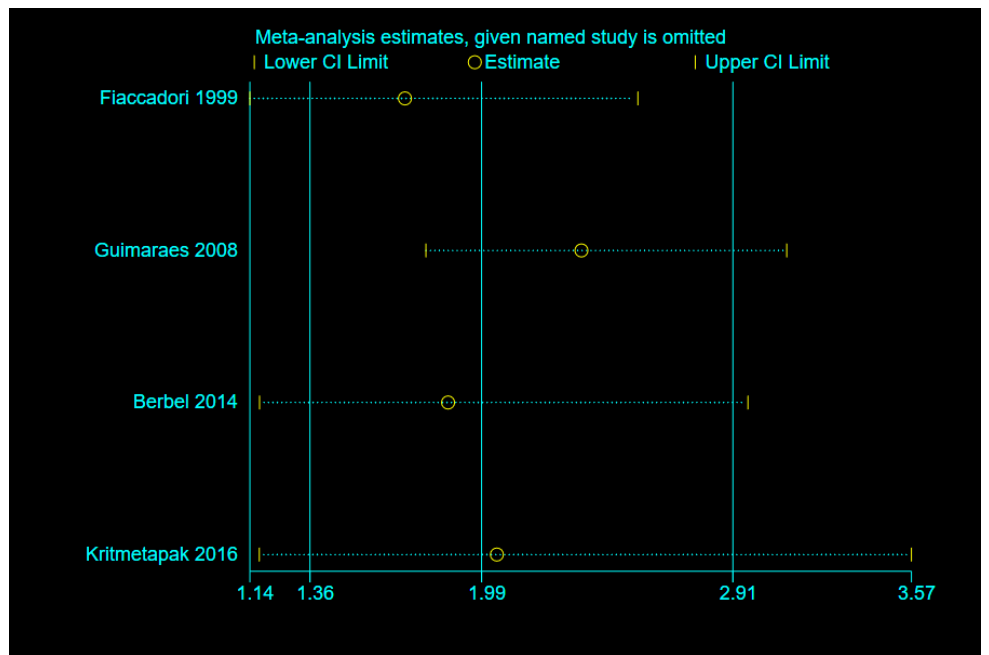

Figure S1: Sensitivity analysis

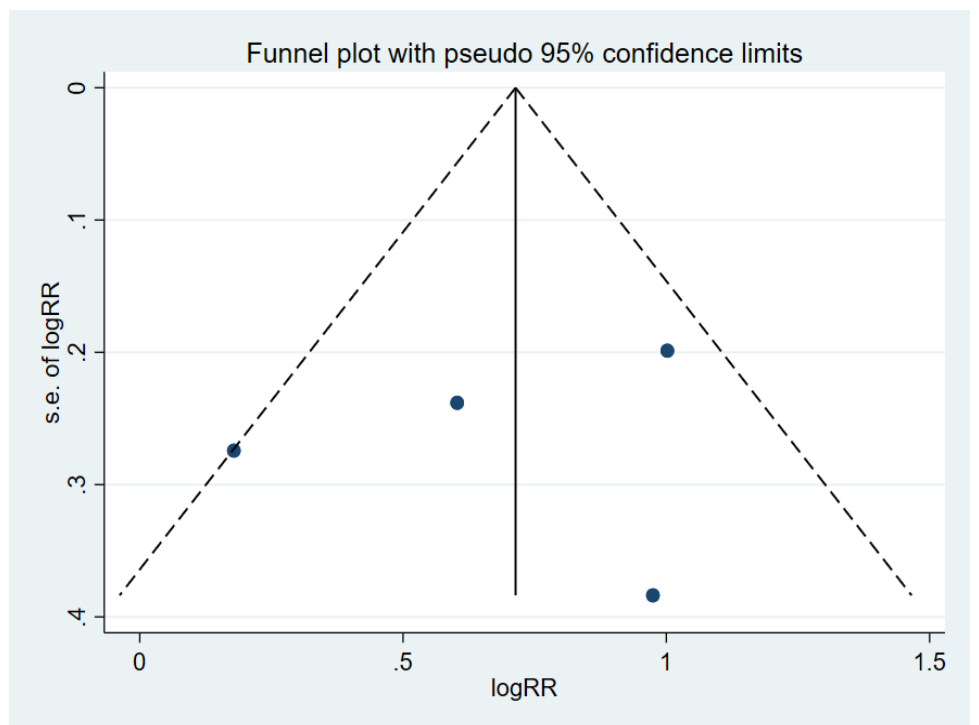

Figure S2: Funnel plot
